# Supplementary material for: Dietary Exposure to the Environmental Chemical, PFOS on the Diversity of Gut Microbiota, Associated With the Development of Metabolic Syndrome
Source: PubMed Central journal article supplement (PMC6207688; doi:10.3389/fmicb.2018.02552), 2018-10-24
Supplement: Table_1.pdf [file Table_1.pdf]

| SampleName | ReadsLength(bp) | RawData(Mbp) | Adapter(%) | NBase(%) | PloyBase(%) | LowQuality(%) | CleanData(Mbp) | DataUtilizationRatio(%) | RawReads | CleanReads | ReadUtilizationRatio(%) |
|------------|-----------------|--------------|------------|----------|-------------|---------------|----------------|-------------------------|----------|------------|-------------------------|
| AC1        | 297:294         | 57.4         | 0          | 0.001    | 0.003       | 14.568        | 38.58          | 67.2                    | 97130*2  | 70159*2    | 72.23                   |
| AC2        | 296:294         | 55.17        | 0          | 0        | 0.002       | 9.955         | 41.9           | 75.95                   | 93501*2  | 75694*2    | 80.96                   |
| AC3        | 294:294         | 63.3         | 0          | 0.002    | 0.002       | 14.11         | 43.22          | 68.29                   | 107648*2 | 78882*2    | 73.28                   |
| AC4        | 293:294         | 72.32        | 0          | 0.003    | 0.008       | 13.355        | 50.51          | 69.85                   | 123199*2 | 92307*2    | 74.93                   |
| AC5        | 300:294         | 70.33        | 0          | 0.001    | 0.003       | 11.885        | 50.91          | 72.39                   | 118397*2 | 91536*2    | 77.31                   |
| AH1        | 300:293         | 88.89        | 0          | 0.002    | 0.031       | 13.54         | 61.44          | 69.12                   | 149896*2 | 110819*2   | 73.93                   |
| AH2        | 299:293         | 79.22        | 0          | 0.003    | 0.003       | 14.378        | 53.49          | 67.53                   | 133811*2 | 96562*2    | 72.16                   |
| AH3        | 298:293         | 33.37        | 0          | 0.004    | 0.064       | 15.277        | 21.75          | 65.19                   | 56462*2  | 39568*2    | 70.08                   |
| AH4        | 296:293         | 54.8         | 0          | 0.001    | 0.019       | 9.977         | 41.8           | 76.28                   | 93044*2  | 75528*2    | 81.17                   |
| AL1        | 299:294         | 103.55       | 0          | 0.003    | 0.013       | 12.596        | 73.41          | 70.89                   | 174624*2 | 132337*2   | 75.78                   |
| AL2        | 298:294         | 45.18        | 0          | 0.005    | 0.005       | 13.189        | 31.33          | 69.34                   | 76315*2  | 56706*2    | 74.31                   |
| AL3        | 297:293         | 45.71        | 0          | 0.002    | 0.009       | 13.234        | 31.99          | 69.98                   | 77477*2  | 57936*2    | 74.78                   |
| AL4        | 296:293         | 48.64        | 0          | 0.002    | 0.004       | 14.815        | 32.46          | 66.73                   | 82583*2  | 59029*2    | 71.48                   |
| AL5        | 294:293         | 42.55        | 0          | 0.003    | 0.014       | 14.285        | 29.03          | 68.23                   | 72490*2  | 52849*2    | 72.91                   |
| AL6        | 293:293         | 63.1         | 0          | 0.001    | 0.018       | 15.865        | 41.27          | 65.4                    | 107683*2 | 75701*2    | 70.3                    |
